# Supplementary material for: Urinary Sodium Excretion Enhances the Effect of Alcohol on Blood Pressure
Source: MDPI journal article supplement (doi:10.3390/healthcare10071296), 2022-07-13
Supplement: s1 [file s1]

## **Supplemental Materials**

### **Urinary sodium excretion enhances the effect of alcohol on blood pressure**

Xiyun Jiang, MSc; Mila D. Anasanti, PhD; Fotios Drenos, PhD; Alexandra I. Blakemore, PhD; Raha Pazoki, MD, PhD

**Table S1. UK Biobank data fields for blood pressure, physical and lifestyle variables used in the analysis.**

| <b>Variable name</b>                           | <b>UK Biobank data field(s)</b>                                  |
|------------------------------------------------|------------------------------------------------------------------|
| Alcohol intake (g/day)                         | 1558, 1588,1578,1608,1568,1598                                   |
| Systolic blood pressure*                       | 4080,93                                                          |
| Diastolic blood pressure*                      | 4079,94                                                          |
| Urinary sodium                                 | 30530                                                            |
| Smoking status                                 | 20116                                                            |
| Sedentary lifestyle                            | 1070, 1090, 1080                                                 |
| Dietary approaches to stop hypertension (DASH) | 1309, 1319, 1299, 1289, 1329, 1339, 1408, 1349, 1369, 1379, 1389 |
| Townsend deprivation score                     | 189                                                              |

\*We manually adjusted systolic and diastolic blood pressure for participants taking blood pressure medication by adding 15 mmHg to their systolic blood pressure measurement and 10 mmHg to their diastolic blood pressure measurement.<sup>16</sup>

**Table S2. Codes used to generate cardiovascular disease phenotypes in the analysis.**

| <b>Phenotype</b>                     | <b>Code</b>                                                                                                                                                                                                                                                                                                                                                                                                                           |
|--------------------------------------|---------------------------------------------------------------------------------------------------------------------------------------------------------------------------------------------------------------------------------------------------------------------------------------------------------------------------------------------------------------------------------------------------------------------------------------|
| Fatal and nonfatal CVD<br>(HES data) | <b>ICD10:</b> I20, I21, I22, I23, I24, I25, I61, I60, I63, I64, I50, I42                                                                                                                                                                                                                                                                                                                                                              |
|                                      | <b>ICD 9:</b> 428, 410, 411, 412, 413, 414, 4297, 431, 430, 434, 436, 425                                                                                                                                                                                                                                                                                                                                                             |
|                                      | <b>OPCS:</b> K40, K401, K402, K403, K404, K408, K409, K41, K411, K412, K413, K414, K418, K419, K42, K421, K422, K423, K424, K428, K429, K43, K431, K432, K433, K434, K438, K439, K44, K441, K448, K449, K45, K451, K452, K453, K454, K455, K458, K459, K46, K461, K462, K463, K464, K468, K469, K442, K456, K465, K471, K49, K491, K492, K493, K494, K498, K499, K50, K501, K504, K508, K509, K75, K751, K752, K753, K754, K758, K759 |
| Prevalent CVD excluded               | <b>UKB data field 20002:</b> 1081, 1082, 1583, 1086, 1491, 1066, 1067, 1087, 1492, 1591, 1074, 1075, 1076, 1079                                                                                                                                                                                                                                                                                                                       |
|                                      | <b>UKB data field 20004:</b> 1071, 1102, 1103, 1104, 1105, 1107, 1108, 1109, 1110, 1515, 1095, 1070                                                                                                                                                                                                                                                                                                                                   |
|                                      | <b>UKB data field 6150:</b> 1,2,3                                                                                                                                                                                                                                                                                                                                                                                                     |

CVD, Cardiovascular disease; HES, Hospital Episode Statistics; ICD, International Classification of Diseases; OPCS, Classification of Interventions and Procedures; UKB, UK Biobank. Table adapted from Pazoki et al.<sup>15</sup>

**Table S3. Genetic variants used to construct the genetic risk score for alcohol consumption.**

| SNP        | Chromosome | Position  | Effect allele | Effect estimates | SE     |
|------------|------------|-----------|---------------|------------------|--------|
| rs10753661 | 1          | 165119792 | A             | -0.0071          | 0.0032 |
| rs12031875 | 1          | 71585097  | G             | 0.0035           | 0.0039 |
| rs227179   | 1          | 210216731 | G             | 0.0051           | 0.0030 |
| rs2310752  | 1          | 66392405  | A             | -0.0045          | 0.0030 |
| rs28680958 | 1          | 173848808 | A             | -0.0133          | 0.0037 |
| rs58107686 | 1          | 33837334  | A             | -0.0126          | 0.0035 |
| rs7517344  | 1          | 50711961  | A             | 0.0086           | 0.0040 |
| rs780569   | 1          | 4569436   | A             | -0.0018          | 0.0033 |
| rs823114   | 1          | 205719532 | A             | 0.0098           | 0.0030 |
| rs10496076 | 2          | 57942987  | C             | 0.0079           | 0.0031 |
| rs11692435 | 2          | 98275354  | A             | 0.0067           | 0.0050 |
| rs1260326  | 2          | 27730940  | C             | 0.0140           | 0.0031 |
| rs13024996 | 2          | 144225215 | A             | -0.0088          | 0.0031 |
| rs13032049 | 2          | 63581507  | G             | 0.0160           | 0.0033 |
| rs13383034 | 2          | 45155276  | T             | 0.0115           | 0.0031 |
| rs13390019 | 2          | 97797680  | C             | -0.0060          | 0.0046 |
| rs2178197  | 2          | 27860551  | G             | -0.0022          | 0.0030 |
| rs56337305 | 2          | 225475560 | C             | -0.0106          | 0.0031 |
| rs72859280 | 2          | 147956293 | T             | 0.0349           | 0.0083 |
| rs77165542 | 2          | 430975    | T             | -0.0134          | 0.0089 |
| rs785293   | 2          | 53023304  | G             | 0.0049           | 0.0030 |
| rs828867   | 2          | 74334462  | A             | 0.0068           | 0.0030 |
| rs13066454 | 3          | 93994255  | T             | -0.0045          | 0.0031 |
| rs13094887 | 3          | 70968431  | T             | -0.0069          | 0.0033 |
| rs2011092  | 3          | 141124607 | C             | -0.0016          | 0.0031 |
| rs60654199 | 3          | 141267295 | A             | -0.0218          | 0.0064 |
| rs62250685 | 3          | 85457240  | G             | -0.0124          | 0.0031 |
| rs6787172  | 3          | 158187811 | G             | -0.0117          | 0.0030 |
| rs9838144  | 3          | 131576287 | C             | -0.0065          | 0.0036 |
| rs10004020 | 4          | 152968372 | A             | 0.0029           | 0.0033 |
| rs10028756 | 4          | 100254520 | A             | -0.0068          | 0.0046 |
| rs11940694 | 4          | 39414993  | G             | 0.0229           | 0.0030 |
| rs1229984  | 4          | 100239319 | C             | 0.1450           | 0.0085 |
| rs12499107 | 4          | 99678691  | G             | 0.0028           | 0.0043 |
| rs12646808 | 4          | 3249828   | C             | -0.0067          | 0.0032 |
| rs13107325 | 4          | 103188709 | T             | -0.0350          | 0.0066 |
| rs16854020 | 4          | 42117559  | A             | 0.0136           | 0.0046 |
| rs2165670  | 4          | 100286085 | A             | 0.0256           | 0.0046 |
| rs36052336 | 4          | 100273594 | G             | -0.0163          | 0.0063 |
| rs3748034  | 4          | 3446091   | T             | -0.0169          | 0.0042 |
| rs4690727  | 4          | 143648579 | G             | 0.0117           | 0.0033 |
| rs4699791  | 4          | 101243023 | A             | 0.0023           | 0.0050 |
| rs7698119  | 4          | 171070910 | A             | -0.0082          | 0.0030 |
| rs79139602 | 4          | 100444363 | T             | 0.0076           | 0.0103 |
| rs10078588 | 5          | 166816176 | A             | 0.0086           | 0.0030 |

| SNP         | Chromosome | Position  | Effect allele | Effect estimates | SE     |
|-------------|------------|-----------|---------------|------------------|--------|
| rs12655091  | 5          | 144412335 | A             | -0.0108          | 0.0030 |
| rs4916723   | 5          | 87854395  | C             | -0.0093          | 0.0030 |
| rs55872084  | 5          | 155902003 | T             | 0.0199           | 0.0036 |
| rs10085696  | 7          | 69783020  | G             | -0.0145          | 0.0038 |
| rs10249167  | 7          | 98980879  | G             | -0.0120          | 0.0046 |
| rs34060476  | 7          | 73037956  | G             | 0.0080           | 0.0045 |
| rs35034355  | 7          | 103840115 | A             | -0.0092          | 0.0030 |
| rs6951574   | 7          | 153489744 | C             | 0.0087           | 0.0030 |
| rs1217091   | 8          | 64527399  | C             | 0.0111           | 0.0038 |
| rs13250583  | 8          | 20949917  | T             | -0.0096          | 0.0036 |
| rs2356369   | 8          | 64956882  | C             | 0.0074           | 0.0030 |
| rs28601761  | 8          | 126500031 | G             | 0.0123           | 0.0030 |
| rs55932213  | 9          | 108755622 | G             | 0.0089           | 0.0034 |
| rs74424378  | 9          | 109331094 | G             | -0.0053          | 0.0035 |
| rs17665139  | 10         | 125093880 | T             | -0.0122          | 0.0042 |
| rs61873510  | 10         | 102626510 | T             | -0.0063          | 0.0032 |
| rs7074871   | 10         | 110507806 | A             | -0.0101          | 0.0034 |
| rs12795042  | 11         | 133658168 | C             | -0.0131          | 0.0031 |
| rs1713676   | 11         | 113660576 | G             | -0.0070          | 0.0030 |
| rs2071305   | 11         | 47370957  | C             | -0.0092          | 0.0032 |
| rs485425    | 11         | 121544984 | G             | 0.0062           | 0.0030 |
| rs4938230   | 11         | 116075001 | A             | 0.0120           | 0.0042 |
| rs7121986   | 11         | 113355444 | C             | 0.0110           | 0.0031 |
| rs748919    | 11         | 133783232 | C             | -0.0061          | 0.0039 |
| rs7950166   | 11         | 8642218   | T             | -0.0094          | 0.0031 |
| rs988748    | 11         | 27724745  | G             | 0.0089           | 0.0036 |
| rs10506274  | 12         | 81601464  | T             | -0.0076          | 0.0030 |
| rs10876188  | 12         | 51895882  | T             | -0.0080          | 0.0030 |
| rs12312693  | 12         | 57511734  | C             | 0.0039           | 0.0030 |
| rs4842786   | 12         | 92170791  | A             | -0.0145          | 0.0030 |
| rs57281063  | 12         | 54660427  | A             | 0.0089           | 0.0030 |
| rs7958704   | 12         | 51984349  | C             | 0.0011           | 0.0030 |
| rs500321    | 13         | 27124360  | T             | -0.0110          | 0.0034 |
| rs112635299 | 14         | 94838142  | T             | -0.0405          | 0.0116 |
| rs11625650  | 14         | 104610138 | A             | -0.0101          | 0.0036 |
| rs2277499   | 14         | 57271127  | T             | -0.0089          | 0.0031 |
| rs71414193  | 14         | 58685301  | A             | -0.0115          | 0.0038 |
| rs12907323  | 15         | 86796012  | G             | 0.0079           | 0.0030 |
| rs2472297   | 15         | 75027880  | T             | 0.0088           | 0.0034 |
| rs1104608   | 16         | 73912588  | C             | -0.0071          | 0.0030 |
| rs113443718 | 16         | 29892184  | A             | -0.0083          | 0.0032 |
| rs11648570  | 16         | 72356964  | C             | 0.0151           | 0.0049 |
| rs1421085   | 16         | 53800954  | C             | -0.0109          | 0.0030 |
| rs17177078  | 16         | 24810681  | T             | -0.0187          | 0.0060 |
| rs2764771   | 16         | 20013793  | A             | 0.0085           | 0.0032 |
| rs378421    | 16         | 28754684  | A             | -0.0154          | 0.0030 |
| rs62044525  | 16         | 64872590  | G             | -0.0163          | 0.0039 |

| <b>SNP</b> | <b>Chromosome</b> | <b>Position</b> | <b>Effect allele</b> | <b>Effect estimates</b> | <b>SE</b> |
|------------|-------------------|-----------------|----------------------|-------------------------|-----------|
| rs7185555  | 16                | 69131281        | C                    | -0.0170                 | 0.0042    |
| rs10438820 | 17                | 78524597        | T                    | 0.0118                  | 0.0033    |
| rs1053651  | 17                | 37822311        | C                    | 0.0036                  | 0.0033    |
| rs1991556  | 17                | 44083402        | A                    | -0.0089                 | 0.0037    |
| rs2854334  | 17                | 29715500        | G                    | 0.0119                  | 0.0030    |
| rs3803800  | 17                | 7462969         | G                    | 0.0101                  | 0.0036    |
| rs4548913  | 17                | 2209888         | A                    | -0.0042                 | 0.0031    |
| rs4794015  | 17                | 47067826        | A                    | 0.0076                  | 0.0030    |
| rs4092465  | 18                | 55080437        | G                    | -0.0125                 | 0.0031    |
| rs9320010  | 18                | 53053897        | G                    | -0.0070                 | 0.0031    |
| rs281379   | 19                | 49214274        | A                    | 0.0173                  | 0.0030    |
| rs4815364  | 20                | 25035711        | A                    | 0.0073                  | 0.0031    |
| rs9607814  | 22                | 41946519        | A                    | -0.0066                 | 0.0040    |

SNP location, effect alleles, effect estimates, and SE were taken from the GWAS (Genome-wide association study) meta-analysis by Liu et al. for alcohol consumption (logarithm transformed alcoholic drinks per week) combining the GSCAN (GWAS & Sequencing Consortium of Alcohol and Nicotine use) cohorts but excluding the UK Biobank and 23andMe. SNP, single nucleotide polymorphism; SE, standard error.

**Table S4. Sex-specific effect of alcohol genetic risk on blood pressure and cardiovascular diseases.**

|                             |       | N non-cases/<br>N cases | Effect<br>estimate/<br>OR/HR * | 95% CI     | P value                |
|-----------------------------|-------|-------------------------|--------------------------------|------------|------------------------|
| <b>SBP, mmHg</b>            |       |                         |                                |            |                        |
| <b>Model 1</b>              | Men   | 134,169                 | 0.38                           | 0.28,0.47  | $8.98 \times 10^{-14}$ |
|                             | Women | 161,020                 | 0.24                           | 0.14,0.33  | $1.40 \times 10^{-6}$  |
| <b>Model 2</b>              | Men   | 134,169                 | 0.30                           | 0.20,0.40  | $4.50 \times 10^{-9}$  |
|                             | Women | 161,020                 | 0.18                           | 0.08,0.26  | $2.83 \times 10^{-4}$  |
| <b>DBP, mmHg</b>            |       |                         |                                |            |                        |
| <b>Model 1</b>              | Men   | 134,169                 | 0.19                           | 0.13,0.25  | $4.38 \times 10^{-10}$ |
|                             | Women | 161,020                 | 0.12                           | 0.07,0.18  | $1.29 \times 10^{-5}$  |
| <b>Model 2</b>              | Men   | 134,169                 | 0.16                           | 0.10,0.22  | $1.04 \times 10^{-7}$  |
|                             | Women | 161,020                 | 0.11                           | 0.05,0.16  | $8.55 \times 10^{-5}$  |
| <b>Hypertension Stage 1</b> |       |                         |                                |            |                        |
| <b>Model 1</b>              | Men   | 22,997/31,492           | 1.01                           | 1.00,1.03  | 0.14                   |
|                             | Women | 50,434/36,792           | 1.01                           | 1.00,1.02  | 0.13                   |
| <b>Model 2</b>              | Men   | 22,997/31,492           | 1.01                           | 0.99,1.03  | 0.39                   |
|                             | Women | 50,434/36,792           | 1.01                           | 0.99,1.02  | 0.24                   |
| <b>Hypertension Stage 2</b> |       |                         |                                |            |                        |
| <b>Model 1</b>              | Men   | 54,489/79,680           | 1.04                           | 1.03,1.05  | $5.37 \times 10^{-11}$ |
|                             | Women | 87,226/73,794           | 1.02                           | 1.01,1.03  | $5.07 \times 10^{-4}$  |
| <b>Model 2</b>              | Men   | 54,489/79,680           | 1.03                           | 1.02,1.05  | $1.35 \times 10^{-8}$  |
|                             | Women | 87,226/73,794           | 1.01                           | 1.00,1.02  | 0.02                   |
| <b>Stroke</b>               |       |                         |                                |            |                        |
| <b>Model 1</b>              | Men   | 133,121/1,048           | 1.08                           | 1.01,1.15  | 0.02                   |
|                             | Women | 160,211/809             | 1.09                           | 1.02,1.17  | 0.02                   |
| <b>Model 2</b>              | Men   | 133,121/1,048           | 1.06                           | 0.99,1.13  | 0.08                   |
|                             | Women | 160,211/809             | 1.07                           | 1.00, 1.15 | 0.06                   |
| <b>CVDs</b>                 |       |                         |                                |            |                        |
| <b>Model 1</b>              | Men†  | 128,361/5,808           | 1.03                           | 1.00,1.06  | 0.03                   |
|                             | Women | 158,140/2,880           | 1.03                           | 0.99,1.07  | 0.15                   |
| <b>Model 2</b>              | Men   | 128,361/5,808           | 1.02                           | 0.99,1.05  | 0.16                   |
|                             | Women | 158,140/2,880           | 1.02                           | 0.98,1.06  | 0.37                   |

\*Effect estimates were derived from multivariate linear regression (for systolic blood pressure and diastolic blood pressure), logistic regression (for hypertension), and multivariate Cox proportional hazards regression (for stroke and CVDs) models. Odds ratio represents the risk of hypertension for each standard deviation increase in the alcohol genetic risk score. †Model additionally fitted with an interaction between age and follow-up time. N, sample size; OR Odds Ratio; HR, Hazard Ratio; CI, confidence intervals; CVDs, Cardiovascular diseases; SBP, Systolic blood pressure; DBP, Diastolic blood pressure.

**Table S5. Overview of association of urinary sodium with alcohol consumption and various outcomes.**

|                                                                   | <b>Effect<br/>Estimate</b> | <b>95% CI</b>  | <b>P-value</b>         |
|-------------------------------------------------------------------|----------------------------|----------------|------------------------|
| <b>Stage 1 hypertension *</b>                                     | 0.09                       | 0.08, 0.1      | $3.7 \times 10^{-50}$  |
| <b>Stage 2 hypertension *</b>                                     | 0.16                       | 0.15, 0.17     | $5.3 \times 10^{-282}$ |
| <b>Diabetes, diagnosed by doctor *</b>                            | 0.15                       | 0.13, 0.17     | $9.9 \times 10^{-42}$  |
| <b>MI *</b>                                                       | 0.10                       | 0.06, 0.13     | $2.4 \times 10^{-07}$  |
| <b>Stroke *</b>                                                   | 0.04                       | -0.01, 0.09    | $1.5 \times 10^{-01}$  |
| <b>CVD *</b>                                                      | 0.08                       | 0.05, 0.1      | $3.8 \times 10^{-11}$  |
| <b>Fatal CAD *</b>                                                | 0.12                       | 0.03, 0.2      | $7.3 \times 10^{-03}$  |
| <b>Average weekly red wine intake, glasses †</b>                  | -0.0138                    | -0.014, -0.013 | 0                      |
| <b>Average weekly champagne plus white wine intake, glasses †</b> | -0.0139                    | -0.014, -0.013 | 0                      |
| <b>Average weekly beer plus cider intake, pints †</b>             | -0.0136                    | -0.014, -0.013 | 0                      |
| <b>Average weekly spirits intake, measures †</b>                  | -0.0143                    | -0.015, -0.014 | 0                      |
| <b>Average weekly fortified wine intake, glasses †</b>            | -0.0139                    | -0.014, -0.013 | 0                      |
| <b>Total alcohol consumption (g/day)</b>                          | -0.0143                    | -0.015, -0.014 | 0                      |

\* Effect estimate is given for the effect of urinary sodium excretion on cardiovascular phenotypes from a logistic model adjusted for age, and sex. † Effect estimate is given for the effect of weekly consumption of alcoholic beverages (exposure) on urinary sodium (outcome). The linear model is adjusted for age and sex. CAD, coronary artery disease; CVD, cardiovascular diseases; MI, myocardial infarction
